# Supplementary material
Source: Springer Nature journal article supplement (https://www.springermedizin.de/resource/supplementary/12911_2009_304_MOESM13_ESM.pdf/9525492)

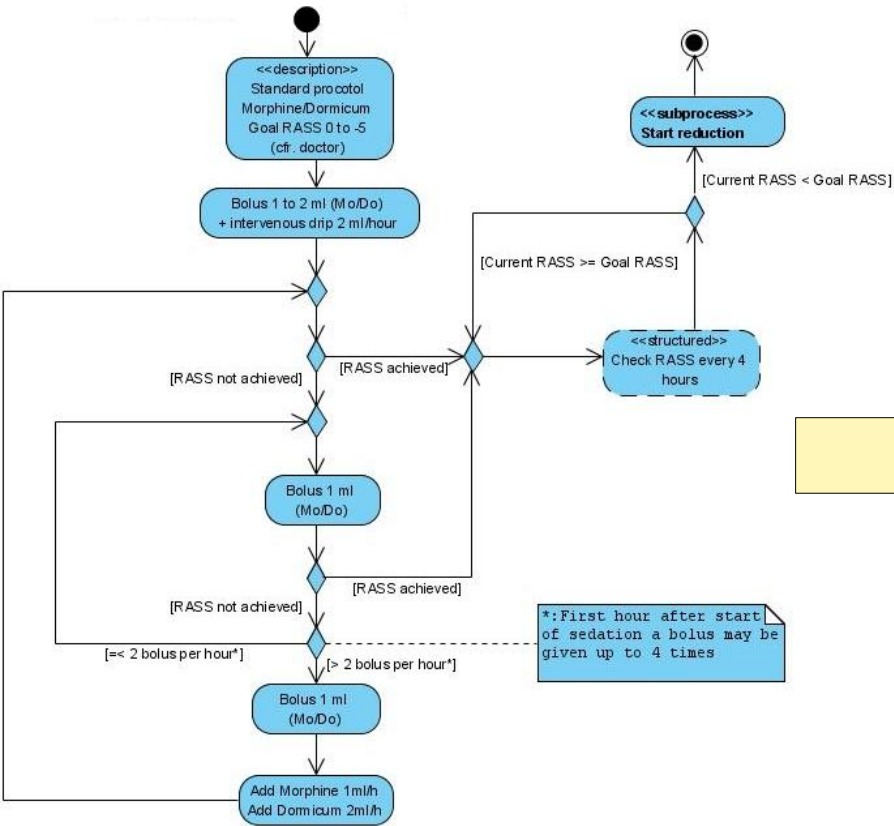

Translate

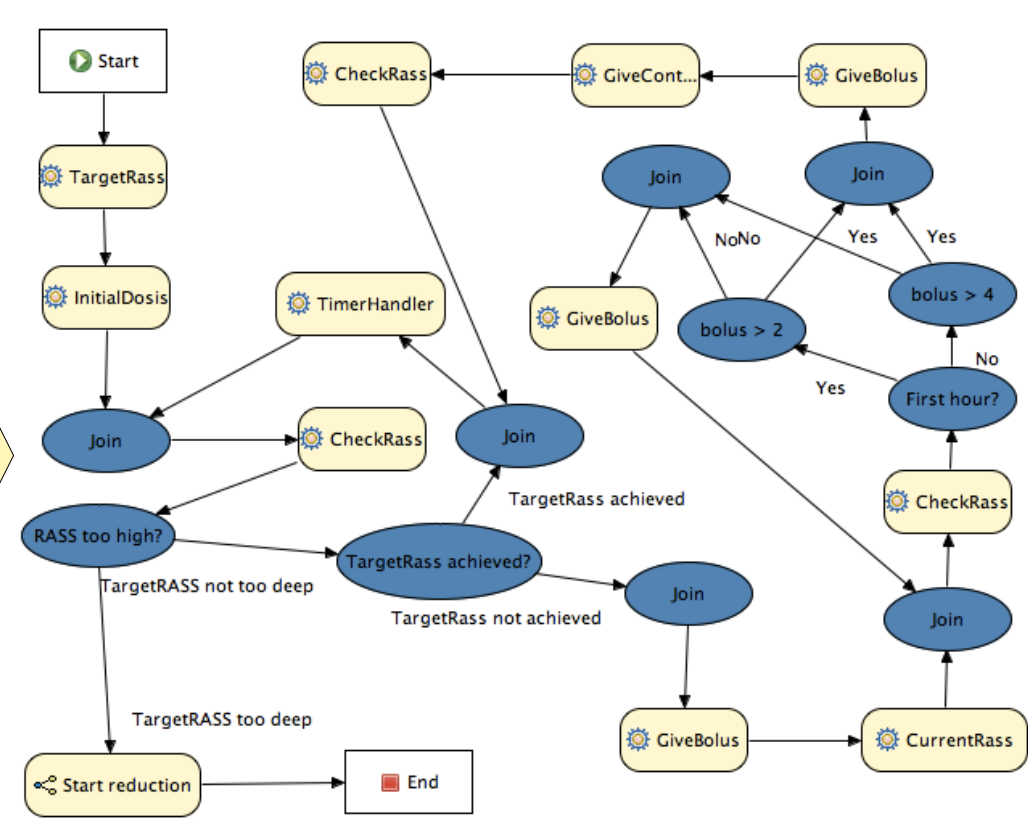

Supplement: MOESM13 [file 9525492]
